# Supplementary material
Source: PubMed Central journal article supplement (PMC4270933)

## **SUPPLEMENTAL MATERIAL**

**Supplemental Table 1.** Location and extent of blocks of non-IBD containing genes of the immunoreceptor pathway and effects of ancestral variation on protein coding genes in block. The table indicates only genes with non-synonymous variation from the Brown-Norway (BN) reference genome in each block and omits the immunoglobulin heavy chain (chr 6) because of the extreme variation observed in this gene. The table also indicates confirmation of alleles in whole genome sequence from another SHR-A3 colony (Glasgow) and whether the variant allele is present in either of 2 injury-resistant (SHRSR) lines for which whole genome sequence data is available.

| Gene name            | Chr       | Start position     | End position       | Variation from BN in | AA change  | Confirm A3 genotype in SHRA3/Gla | Present in other SHRSR? |
|----------------------|-----------|--------------------|--------------------|----------------------|------------|----------------------------------|-------------------------|
| <b>Block Non-IBD</b> | <b>3</b>  | <b>158,090,000</b> | <b>161,780,000</b> |                      |            |                                  |                         |
| Ndr3                 | 3         | 158,614,195        | 158,725,392        | A3                   | Ser17Arg   | Y                                | N                       |
| Tgm2                 | 3         | 160,977,905        | 161,007,260        | A3                   | Asp94Asn   | Y                                | N                       |
| Tti1                 | 3         | 161,113,415        | 161,140,919        | A3                   | Thr663Ile  | Y                                | Y                       |
| Tti1                 | 3         | 161,113,415        | 161,140,919        | A3                   | Lys665Phe  | Y                                | Y                       |
| <b>Block Non-IBD</b> | <b>6</b>  | <b>146,030,000</b> | <b>154,190,000</b> |                      |            |                                  |                         |
| Gpr132               | 6         | 146,660,012        | 146,648,353        | B2                   | Asp189Asn  | Y                                | Y                       |
| Gpr132               | 6         | 146,660,012        | 146,648,353        | A3                   | Thr26Met   | Y                                | N                       |
| Gpr132               | 6         | 146,660,012        | 146,648,353        | A3                   | Pro5Ser    | Y                                | N                       |
| Adam6                | 6         | 147,426,645        | 147,429,132        | B2                   | Val531Met  | Y                                | Y                       |
| Wdr60                | 6         | 153,061,842        | 153,007,323        | A3                   | Thr49Ala   | Y                                | N                       |
| <b>Block Non-IBD</b> | <b>16</b> | <b>17,650,000</b>  | <b>23,470,000</b>  |                      |            |                                  |                         |
| Dyc2                 | 16        | 18,506,978         | 18,520,588         | A3                   | Pro123Lys  | Y                                | N                       |
| Cyp4f18              | 16        | 19,269,139         | 19,385,553         | B2                   | Tyr242His  | Y                                | Y                       |
| Myo9b                | 16        | 19,529,516         | 19,614,169         | B2                   | Lys1175Gln | Y                                | Y                       |
| Slc27a1              | 16        | 19,859,540         | 19,876,619         | A3                   | His357Arg  | Y                                | N                       |
| Fam129c              | 16        | 19,887,776         | 19,899,606         | A3                   | Cys7Ser    | Y                                | N                       |
| B3gnt3               | 16        | 19,984,402         | 19,993,283         | A3                   | Pro68Arg   | Y                                | N                       |
| Crif1                | 16        | 20,541,796         | 20,530,521         | B2                   | Lys32Phe   | Y                                | 1 of 2                  |
| Gdf1                 | 16        | 20,712,564         | 20,698,125         | A3                   | Ala173Thr  | Y                                | N                       |
| Sugp2                | 16        | 20,789,858         | 20,760,491         | B2                   | Ser298Gly  | Y                                | Y                       |
| Armc6                | 16        | 20,789,624         | 20,799,784         | B2                   | Ser263Asn  | Y                                | Y                       |
| Tmem161a             | 16        | 20,846,231         | 20,836,630         | B2                   | Arg98His   | Y                                | Y                       |
| Rfxank               | 16        | 20,879,467         | 20,886,951         | A3                   | Val39Ile   | Y                                | Y                       |
| Gatad2a              | 16        | 21,093,916         | 21,184,110         | B2                   | Ser235Gly  | Y                                | Y                       |
| Cilp2                | 16        | 21,204,960         | 21,211,953         | B2                   | Thr900Ala  | Y                                | 1 of 2                  |
| Sh2d4a               | 16        | 23,044,750         | 22,972,707         | A3                   | Gly236Glu  | Y                                | Y                       |
| <b>Block Non-IBD</b> | <b>17</b> | <b>6,760,000</b>   | <b>16,520,000</b>  |                      |            |                                  |                         |
| Ntrk2                | 17        | 8,156,432          | 8,464,507          | A3                   | Ala187Val  | Y                                | N                       |
| Dok3                 | 17        | 11,748,066         | 11,752,826         | A3                   | Ile71Val   | Y                                | N                       |
| Dok3                 | 17        | 11,748,066         | 11,752,826         | A3                   | Ala83Val   | Y                                | N                       |
| Dbn1                 | 17        | 11,788,597         | 11,802,569         | B2                   | Ala618Val  | Y                                | Y                       |
| Slc34a1              | 17        | 11,856,946         | 11,872,100         | B2                   | Ala630Thr  | Y                                | Y                       |
| Fgfr4                | 17        | 12,099,383         | 12,113,632         | A3                   | Arg95Gly   | Y                                | N                       |
| Hk3                  | 17        | 12,246,816         | 12,261,635         | B2                   | Ser770Asn  | Y                                | Y                       |
| Ror2                 | 17        | 14,050,995         | 14,228,982         | A3                   | Gly744Ser  | Y                                | N                       |

|        |    |            |            |    |           |   |   |
|--------|----|------------|------------|----|-----------|---|---|
| Sema4d | 17 | 15,590,977 | 15,613,214 | B2 | Gly35Glu  | Y | Y |
| Sema4d | 17 | 15,590,977 | 15,613,214 | B2 | Gly617Ser | Y | Y |
| Nxn12  | 17 | 16,120,216 | 16,124,963 | B2 | Ala147Thr | Y | Y |

**IgG Fc variants (positions from rn5):**

1. Location: chr6:147108547 intron

SHR-A3 TAGGAGCTTGGGTCCAGACCTGTCAGACAAAAT

SHR-B2 TAGGAGCTTGGGTCCAAACCTGTCAGACAAAAT

SHR-B2 different from BN reference

2. Location: chr6:147107456 exon

SHR-A3 ACGTTCAGATGCAAGGTCACAGTGCAGCTTTCCCATCC

SHR-B2 ACGTTCAGATGCAAGGTCACAGTGCAGCTTTCCCATCC

SHR-B2 different from BN reference, synonymous

3. Location: chr6:147141845 intron

SHR-A3 AGACAAAATGATCACGCATACTTTTCTTGTAGCTGAAACAAC

SHR-B2 AGACAAAATGATCACGCATACTTTTCTTGTAGCTGAAACAAC

SHR-A3 different from BN reference

4. Location: chr6: 147141478 intron

SHR-A3 TAAGGCATTAGACTGCCTACACAACCAGGGTGGGCAGAC

SHR-B2 TAAGGCATTAGACTGCCTACACAACCAGGGTGGGCAGAC

SHR-A3 different from BN reference

5. Location: chr6: 147141081 intron

SHR-A3 ACAGCTATTGACCTATTTCCACCTTTCTTCTTCATCTA

SHR-B2 ACAGCTATTGACCTATTTCCACCTTTCTTCTTCATCTA

SHR-B2 different from BN reference

6. Location: chr6: 147141059 exon

SHR-A3 TTTCTTCTTCATCTACAGGCTCAGAAGTATCATCTGTC

SHR-B2 TTTCTTCTTCATCTACAGTCCCAGATATATCATCTGTC

SHR-A3 different from BN reference, non-synonymous, Gly to Val,

7. Location: chr6: 147141057 exon

SHR-A3 TCTTCTTCATCTACAGGCTCAGAAGTATCATCTGTCTTCATC

SHR-B2 TCTTCTTCATCTACAGTCCCAGATATATCATCTGTCTTCATC

SHR-A3 different from BN reference, non-synonymous, Ser to Pro

8. Location: chr6: 147141051-2 exon

SHR-A3 TCATCTACAGGCTCAGAAGTATCATCTGTCTTCATCTTCCCC

SHR-B2 TCATCTACAGTCCCAGATATATCATCTGTCTTCATCTTCCCC

SHR-A3 different from BN reference, non-synonymous, Glu to Asp, Val to Ile

9. Location: chr6: 147140508-9 exon

SHR-A3 TCTATCCCCCAGACATTTATGTGGAGTGGAAGATGAACG

SHR-B2 TCTATCCCCCAGACATTTATACGGAGTGGAAGATGAACG

SHR-A3 different from BN reference, non-synonymous, Tyr to Val

10. Location: chr6: 147086792 intron

SHR-A3 GACAGAAAGGATGCCTACACGCAGAAGGTGTAGGGTAGA

SHR-B2 GACAGAAAGGATGCCACACACAGAAGGTGTAGGGTAGA

SHR-A3 different from BN reference

11. Location: chr6: 147086612 intron

SHR-A3 CACTGAAAGATCAAGGCTCCTGGGGCTGGAGAGTTGGCTC  
SHR-B2 CACTGAAAGATCAAGGCTCCTAGGGCTGGAGAGTTGGCTC  
SHR-A3 different from BN reference

12. Location: chr6: 147086388 intron  
SHR-A3 AAGGTCAGAGTGCAGGGTCTAGAGGTGGAAGCTGCTGACACCACTTA  
SHR-B2 AAGGTCAGAGTGCAGGGTCTAGAAAGTGAAGCTGCTGACACCACTTA  
SHR-A3 different from BN reference

13. Location: chr6: 147086179 exon  
SHR-A3 GATACAACCAGCTCCACGGTGACCTGGGATGCCTGGTCAAGGG  
SHR-B2 GATACAACCAGCTCCACGGTGACTCTGGGATGCCTGGTCAAGGG  
SHR-A3 different from BN reference, synonymous

14. Location: chr6: 147086108 exon  
SHR-A3 CCGTGACCTGGAACCTCTGGAGCCCTGTCCAGCGATGTG  
SHR-B2 CCGTGACCTGGAACCTCTGGAGCCCTGTCCAGCGATGTG  
SHR-A3 different from BN reference, non-synonymous, Ala to Pro

15. Location: chr6: 147086092 exon  
SHR-A3 GTCCAGCGATGTGCACACCTTCCAGCTGTCCTGCAGTCTGGGC  
SHR-B2 GTCCAGCGATGTGCACACCTTCCAGCTGTCCTGCAGTCTGGGC  
SHR-A3 different from BN reference, synonymous

16. Location: chr6: 147086065 exon  
SHR-A3 CTGTCCTGCAGTCTGGGCTCTACTCTCACCAGCTCAGTGA  
SHR-B2 CTGTCCTGCAGTCTGGGCTCTACTCTCACCAGCTCAGTGA  
SHR-B2 different from BN reference, synonymous

17. Location: chr6: 147085968 exon  
SHR-A3 CACCAAGGTGGACAAGAAAATTGGTGAGAGGACAACCA  
SHR-B2 CACCAAGGTGGACAAGAAAGTTGGTGAGAGAACAACCA  
SHR-A3 different from BN reference, non-synonymous Val to Ile

18. Location: chr6: 147085957 intron  
SHR-A3 GGACAAGAAAATTGGTGAGAGGACAACCAAGGGACGAGG  
SHR-B2 GGACAAGAAAGTTGGTGAGAGACAACCAGGGGACGAGG  
SHR-B2 different from BN reference

19. Location: chr6: 147085949 intron  
SHR-A3 TTGGTGAGAGGACAACCAAGGGACGAGGGGCTCACTAGAC  
SHR-B2 TTGGTGAGAGAACAACCAGGGGACGAGGGGCTCACTAGAC  
SHR-A3 different from BN reference

20. Location: chr6: 147085908 intron  
SHR-A3 GTGAGGATAAGGCATTAGATGCCTACACCAACCAGGGT  
SHR-B2 GTGAGGATAAGGCATTAGATTGCCTACACCAACCAGGGT  
SHR-A3 different from BN reference

21. Location: chr6: 147085842 intron  
SHR-A3 GGGGGCCTCAGCCCGGGAGACACTGTCACTGCCTCCCTCCTGGAGGCCTC  
SHR-B2 GGGGGCCTCAGCCCGGGAGACACTGTCTCTGCCTCCCTCCTGGAGGCCTC  
SHR-A3 different from BN reference

22. Location: chr6: 147085758 intron  
SHR-A3 AGACATGATCCTCTGGTATAGATGTCTATGTGCATGTATAGGATCATAAC  
SHR-B2 AGACATGATCCTCTGGTATAGATGTCTGTGTGCATGCATAGGATCATAAC  
SHR-A3 different from BN reference

23. Location: chr6: 147085750 intron  
SHR-A3 TGGTATAGATGTCTATGTGCATGTATAGGATCATAACCAGGGACAAA  
SHR-B2 TGGTATAGATGTCTGTGTGCATGCATAGGATCATAACCAGGGACAAA  
SHR-A3 different from BN reference

24. Location: chr6: 147085643 exon  
SHR-A3 CTCTACAGAGCGCAGAAATGGCGGCAATGGACACAAATG  
SHR-B2 CTCTACAGAGCGCAGAAATGGCGGCAATGGACACAAATG  
SHR-B2 different from BN reference, non-synonymous, Ile to Asn

25. Location: chr6: 147085580 intron  
SHR-A3 GCCCAGGTAAGTCACTAGACCTGGGCCCCAGCTCCACAATGATGGCA  
SHR-B2 GCCCAGGTAAGTCACTAGACCTGGGCCCCAGCTCCACAATGATGGCA  
SHR-A3 different from BN reference

26. Location: chr6: 147085489 exon  
SHR-A3 CATTCTATCTCTCCTCATCAGTTCCTGAACTCTTGGGTGGACCAT  
SHR-B2 CATTCTATCTCTCCTCATCAGTTCCTGAACTCTTGGGTGGACCAT  
SHR-A3 different from BN reference, non-synonymous, Val to Ala

27. Location: chr6: 147085464 exon  
SHR-A3 TCCTGAACTCTTGGGTGGACCATCTGTCTTCATCTTCCCCCCTAAA  
SHR-B2 TCCTGAACTCTTGGGTGGACCATCTGTCTTCATCTTCCCCCCTAAA  
SHR-A3 different from BN reference, synonymous

28. Location: chr6: 147085449 exon  
SHR-A3 CCATCCGTCTTCATCTTCCCCTCAAAGCCCAAGGACATCCTCTTGA  
SHR-B2 CCATCTGTCTTCATCTTCCCCTCAAAGCCCAAGGACATCCTCTTGA  
SHR-A3 different from BN reference, synonymous

29. Location: chr6: 147085379 exon  
SHR-A3 ACGTGTGTGGTGGTGGATGTGAGTGAGGAGGAGCCGACGTCCAG  
SHR-B2 ACGTGTGTGGTGGTGGATGTGAGTGAGGAGGAGCCGACGTCCAG  
SHR-B2 different from BN reference, synonymous

30. Location: chr6: 147085368 exon  
SHR-A3 TGGATGTGAGCGAGGAGGAGCCGACGTCCAGTTCAGCTGGTTT  
SHR-B2 TGGATGTGAGTGAGGAGGAGCCGACGTCCAGTTCAGCTGGTTT  
SHR-A3 different from BN reference, synonymous

31. Location: chr6: 147085102 intron  
SHR-A3 CTGGGATAGGTATAAGAATGAATGCCCGGTGGACGGCCATGACCTCTGT  
SHR-B2 CTGGGATAGGTATAAGAATGAATGCCCGGTGGACGGCCATGACCTCTGT  
SHR-A3 different from BN reference

31. Location: chr6: 1470850352 exon  
SHR-A3 GTCAGAAAACCACAGGTATATGTCATGGGTCCACCGACAGAGCAG  
SHR-B2 GTCAGAAAACCACAGGTATATGTCATGGGTCCACCGACAGAGCAG  
SHR-A3 different from BN reference, synonymous

32. Location: chr6: 147084991-5001 exon  
SHR-A3 GACAGAGCAGTTGACTGAGAAAGCGGTCATTTTGACCTGCTTGA  
SHR-B2 GACAGAGCAGTTGACTGAGCAAACGGTCAGTTTGACCTGCTTGA  
SHR-A3 different from BN reference, non-synonymous Gln to Lys

33. Location: chr6: 147084818 exon  
SHR-A3 GGAGCAGGTGGGATAGCAGAGCGTCCTTCGTCTGCTCCGTGGTCCACGA  
SHR-B2 GGAGCAGGTGGGATAGCAGAGCGTCCTTCGTCTGCTCCGTGGTCCACGA  
SHR-A3 different from BN reference, non-synonymous, Pro to Ser

34. Location: chr6: 147084778 exon  
SHR-A3 GTCCACGAGGGTCTGCACAATCCACCACGTGGAGAAGAGCATCTC  
SHR-B2 GTCCACGAGGGTCTGCACAATCCACCACGTGGAGAAGAGCATCTC  
SHR-A3 different from BN reference, non-synonymous, His to Arg

35. Location: chr6: 147084600 intron  
SHR-A3 TTCTTTCCGGGTATAGAGCCTAAGTCACGGGCTT  
SHR-B2 TTCTTTCCGGGTATAGAGCCTAAGTCACGGGCTT  
SHR-A3 different from BN reference

36. Location: chr6: 147189280 exon  
SHR-A3 AGCCGGTAACCGTAAAATGGAACCTGGAGCCCTGTCCAGCGGTGTG  
SHR-B2 AGCCGGTAACCGTAAAATGGAACCTGGAGCCCTGTCCAGCGGTGTG  
SHR-B2 different from BN reference, non-synonymous Ser to Tyr

37. Location: chr6: 147189135 exon  
SHR-A3 AGCCACCCAGCCACCAAAAGCACTTGATCAAGAGAATTGGTA  
SHR-B2 AGCCACCCAGCCACCAAAAGCACTTGATCAAGAGAATTGGTA  
SHR-B2 different from BN reference, non-synonymous Asp to Asn

38. Location: chr6: 147189069 intron  
SHR-A3 AATATTTAATCAGGAGGTCAGGCTGGGGTCAACCCCTTGTATAGAACA  
SHR-B2 AATATTTAATCAGGAGGTCAGGCTGGGGTCAACCCCTTGTATAGAACA  
SHR-B2 different from BN reference

39. Location: chr6: 147188923 intron  
SHR-A3 CAGAAAGTGGTCCTCTGGAATGACTACCAGTAGCTCACATCAGGGACA  
SHR-B2 CAGAAAGTGGTCCTCTGGAATGACTACCAGTATCTCACATCAGGGACA  
SHR-B2 different from BN reference

40. Location: chr6: 147188913 intron  
SHR-A3 CTCTGGAATGACTACCAGTAGCTCACATCAGGGACACACAGA  
SHR-B2 CTCTGGAATGACTACCAGTATCTCACATCAGGGACACACAGA  
SHR-B2 different from BN reference

41. Location: chr6: 147188770 intron  
SHR-A3 TCTCCCTTCCAGGCCCATTAATGCCAGTCTTTTCTCTGC  
SHR-B2 TCTCCCTTCCAGGCCCATTAATGCCAGTCTTTTCTCTGC  
SHR-B2 different from BN reference

42. Location: chr6: 147188379 exon  
SHR-A3 GTCAGTACCCTCCATATCCAGCACCAGGACTGGA  
SHR-B2 GTCAGTACCCTCCATATCCAGCACCAGGACTGGA

SHR-B2 different from BN reference, synonymous

43. Location: chr6: 147188230 intron

SHR-A3 CTGGGATGGGCGTAAGAATAAATGCCTGCGTGGACG

SHR-B2 CTGGGATGGGCGTAAGAATAAATGCCTGCGTGGACG

SHR-B2 different from BN reference

44. Location: chr6: 147188078 exon

SHR-A3 ACCAGCTTCTACCCCGCATCCATCAGTGTGGAGT

SHR-B2 ACCAGCTTCTACCCCGCATCCATCAGTGTGGAGT

SHR-A3 different from BN reference (Ala to Pro)

45. Location: chr6: 147187959 exon

SHR-A3 ACAGCAAGCTCAGTGTGGACACGGACAGTTGGATGCGAG

SHR-B2 ACAGCAAGCTCAGTGTGGACACAGACAGTTGGATGCGAG

SHR-B2 different from BN reference, synonymous

Haplotype structure in SHR strains across this region. SHR-A3 and SHRSP/Gla are injury-prone strains. SHR-B2, SHR and SHR/NHsd are injury resistant strains. SHR lines with the same genotype as SHR-A3 at each variant site are colored pink at that site. SHR lines with the same genotype as SHR-B2 are shaded green when this genotype differs from the injury-prone lines. Genome sequence variation for SHRSP/Gla, SHR, SHR/NHsd was provided by the Rat Genome Database.

| Variant # | SHR-A3 | SHRSP/Gla | SHR-B2 | SHR | SHR/NHsd |
|-----------|--------|-----------|--------|-----|----------|
| 1         | G      | G         | A      | A   | A        |
| 2         | C      | C         | T      | T   | T        |
| 3         | A      | A         | T      | T   | T        |
| 4         | A      | A         | C      | C   | C        |
| 5         | T      | T         | C      | C   | C        |
| 6         | G      | G         | T      | T   | T        |
| 7         | T      | T         | C      | C   | C        |
| 8         | AG     | AG        | TA     | TA  | TA       |
| 9         | GT     | GT        | AC     | AC  | AC       |
| 10        | G      | G         | A      | A   | A        |
| 11        | G      | G         | A      | A   | A        |
| 12        | G      | G         | A      | A   | A        |
| 13        | C      | C         | T      | T   | T        |
| 14        | C      | C         | G      | G   | G        |
| 15        | C      | C         | T      | T   | T        |
| 16        | C      | C         | T      | T   | T        |
| 17        | A      | A         | G      | G   | G        |
| 18        | G      | G         | A      | A   | A        |
| 19        | A      | A         | G      | G   | G        |
| 20        | C      | C         | T      | T   | T        |
| 21        | A      | A         | T      | T   | T        |
| 22        | A      | A         | G      | G   | G        |
| 23        | T      | T         | C      | C   | C        |
| 24        | A      | A         | T      | T   | T        |
| 25        | G      | G         | A      | A   | A        |
| 26        | C      | C         | T      | T   | T        |
| 27        | C      | C         | T      | T   | T        |



|    |   |   |   |   |   |
|----|---|---|---|---|---|
| 28 | C | C | G | G | G |
| 29 | C | C | T | T | T |
| 30 | A | A | C | C | C |
| 31 | C | C | T | T | T |
| 32 | A | A | C | C | C |
| 33 | T | T | C | C | C |
| 34 | G | G | A | A | A |
| 35 | A | A | G | G | G |
| 36 | C | C | A | A | A |
| 37 | A | A | G | G | G |
| 38 | G | G | A | A | A |
| 39 | A | A | G | G | G |
| 40 | G | G | T | T | T |
| 41 | C | C | A | A | A |
| 42 | T | T | C | C | C |
| 43 | A | A | G | G | G |
| 44 | C | C | G | G | G |
| 45 | G | G | A | A | A |

**Dok3 variants (positions from rn5):**

1. Location: chr17:11747889 proximal promoter

SHR-A3 AAGCTCCCCATAGGCAGGTACGGTTTCTTGGAACAGCAAGG

SHR-B2 AAGCTCCCCATAGGCAGGTATGGTTTCTTGGAACAGCAAGG

SHR-B2 differs from BN reference seq

2. Location: chr17:11748271 intron

SHR-A3 GTGAAGTGAAAGCTGGAGACGGGAGGTTCTTGGCCCAAGAA

SHR-B2 GTGAAGTGAAAGCTGGAGACAGGAGGTTCTTGGCCCAAGAA

SHR-A3 differs from BN reference seq

3. Location: chr17:11748474 proximal promoter

SHR-A3 CAGGCTGGTTCTCCTGGAGAGAGATGGGCTGGGAATCTAT

SHR-B2 CAGGCTGGTTCTCCTGGAGAGAGATGGGCTGGGAATCTAT

SHR-A3 differs from BN reference seq

4. Location: chr17:11749072 exon 2

SHR-A3 GCCGTAGAGGGGAACGCCGGGTCATACGCTTGCTGACTGT

SHR-B2 GCCGTAGAGGGGAACGCCGGATCATACGCTTGCTGACTGT

SHR-A3 differs from BN reference seq, non-synon Ile to Val (I71V)

5. Location: chr17:11749109 exon 2

SHR-A3 CTGTGTATCTGTTCTGCCGGTGGATGGTGAGAGTTGCCCA

SHR-B2 CTGTGTATCTGTTCTGCCGGCGGATGGTGAGAGTTGCCCA

SHR-A3 differs from BN reference seq, non-synon Ala to Val (A83V)

6. Location: chr17:11749790 intron

SHR-A3 TCCTACCAAGTTGCTCATGGAGCAGCTGGAGAGGTGCTGC

SHR-B2 TCCTACCAAGTTGCTCATGTTGCAGCTGGAGAGGTGCTGC

SHR-B2 differs from BN reference seq

7. Location: chr17:11750490 intron

SHR-A3 CTAAAACCCACTGAACTGGGTACCTTAAAATAGTAATGTCC

SHR-B2 CTAAAACCCACTGAACTGGGAACCTTAAAATAGTAATGTCC

SHR-B2 differs from BN reference seq

8. Location: chr17:11750514 intron

SHR-A3 TTAAAATAGTAATGTCCAGGGCTTGAGAAATGACTCCGTAG

SHR-B2 TTAAAATAGTAATGTCCAGGACTTGAGAAATGACTCCGTAG

SHR-B2 differs from BN reference seq

9. Location: chr17:11750578 intron

SHR-A3 AGAGTAGTAGAGTTCAATTCACAGCAACCACATGGCAGCTC

SHR-B2 AGAGTAGTAGAGTTCAATTCACAGCAACCACATGGCAGCTC

SHR-B2 differs from BN reference seq

10. Location: chr17:11750642 intron

SHR-A3 AGAGGACCTGACACCCTCACCCAATCCAATACACACAAAA

SHR-B2 AGAGGACCTGACACCCTCACCCAATCCAATACACACAAAA

SHR-B2 differs from BN reference seq

11. Location: chr17:11750740 intron

SHR-A3 TGTAGACAAGGTTTCTCCATATAGCCCTGGCTGTTCTAGAA  
 SHR-B2 TGTAGACAAGGTTTCTCCATGTAGCCCTGGCTGTTCTAGAA  
 SHR-B2 differs from BN reference seq

12. Location: chr17:11751049 intron  
 SHR-A3 CTGTCTTGAAAACAAAAAAGGAAAAAAAAAAGTGCAGGTAG  
 SHR-B2 CTGTCTTGAAAACAAAAAAGGAAAAAAAAAAGTGCAGGTAG  
 SHR-B2 differs from BN reference seq

13. Location: chr17:11751393 intron  
 SHR-A3 CCCTGGAGTGTGGGTGAGAGTGGAGACTGATGGCGGAGAGTG  
 SHR-B2 CCCTGGAGTGTGGGTGAGAGTGGAGACTGATGGCGGAGAGTG  
 SHR-B2 differs from BN reference seq

14. Location: chr17:11752923 3'-UTR  
 SHR-A3 TGCTCAGTGTAGCAAACGCCGGCCTCGGCTGGACCCTGAG  
 SHR-B2 TGCTCAGTGTAGCAAACGCCGGCCTCGGCTGGACCCTGAG  
 SHR-A3 differs from BN reference seq

Haplotype structure in SHR strains across this region. SHR-A3 and SHRSP/Gla are injury-prone strains. SHR-B2, SHR and SHR/NHsd are injury resistant strains. SHR lines with the same genotype as SHR-A3 at each variant site are colored pink at that site. SHR lines with the same genotype as SHR-B2 are shaded green when this genotype differs from the injury-prone lines. Genome sequence variation for SHRSP/Gla, SHR, SHR/NHsd was provided by the Rat Genome Database.

| Variant # | SHR-A3 | SHRSP/Gla | SHR-B2 | SHR | SHR/NHsd |
|-----------|--------|-----------|--------|-----|----------|
| 1         | C      | C         | T      | T   | T        |
| 2         | G      | G         | A      | A   | A        |
| 3         | A      | A         | G      | G   | G        |
| 4         | G      | G         | A      | A   | A        |
| 5         | T      | T         | C      | C   | C        |
| 6         | GA     | GA        | TT     | TT  | TT       |
| 7         | T      | T         | A      | A   | A        |
| 8         | G      | G         | A      | A   | A        |
| 9         | C      | C         | T      | T   | T        |
| 10        | G      | G         | A      | A   | A        |
| 11        | A      | A         | G      | G   | G        |
| 12        | A      | A         | -      | -   | -        |
| 13        | T      | T         | C      | C   | C        |
| 14        | G      | G         | A      | A   | A        |

**Src variants (positions are rn5):**

1. Location: chr3:158138524 Promoter

SHR-A3 CAGGACCTTAGTCTGCCTATCTGCTTAGTGGGTAGGGTGTCTTGTCTGTT

SHR-B2 CAGGACCTTAGTCTGCCTATCTGCTTAGTGGGTAGGGTGTCTTGTCTGTT

SHR-A3 differs from BN reference sequence

2. Location: chr3:158138450 Promoter Kozak consensus sequence

SHR-A3 GGGATTTCTGTGCGCCCCAGCCAGGACCATGGGCAGCAACAAGAGCAAGC

SHR-B2 GGGATTTCTGTGCGCCCCAGCCAGGACCATGGGCAGCAACAAGAGCAAGC

SHR-A3 differs from BN reference sequence

3. Location: chr3:158136014 Intron

SHR-A3 TATTCACCCCTCAAGATCCAGGGTGGGGCTGCCCTCCCTGCAAGCAGGT

SHR-B2 TATTCACCCCTCAAGATCCAGGGTGGGGCTGCCCTCCCTGCAAGCAGGT

SHR-A3 differs from BN reference sequence

4. Location: chr3:158134950 Intron

SHR-A3 ACAGTGTTCCTCCAGGAAGTACTGAGCTCTGGGGGGCCGGGGCAGTACAG

SHR-B2 ACAGTGTTCCTCCAGGAAGTACTGAGCTCTGGGGGGCCGGGGCAGTACAG

SHR-A3 differs from BN reference sequence

5. Location: chr3:158131765 Intron

SHR-A3 ATGGCAACCAAGCCAGGCTGCTTCCTGTGGGCCTGGGGCTCAGCAGGAGA

SHR-B2 ATGGCAACCAAGCCAGGCTGCTTCCTGTGGGCCTGGGGCTCAGCAGGAGA

SHR-A3 differs from BN reference sequence

6. Location: chr3:158129031 Intron

SHR-A3 TGTGGCCAGGTCTCACACCAAGCCTCAGCCTCCTGATGTGAACAC

SHR-B2 TGTGGCCAGGTCTCACACCAAGCCTCAGCCTCCTGATGTGAACAC

SHR-A3 differs from BN reference sequence

7. Location: chr3:158128929 Intron

SHR-A3 AGTGCTGTGCGGAGGGAGTAGTGGGAAGTAGGTGTCCGGTCTCCCG

SHR-B2 AGTGCTGTGCGGAGGGAGTAATGGGAAGTAGGTGTCCGGTCTCCCG

SHR-A3 differs from BN reference sequence

8. Location: chr3:158127846 Intron

SHR-A3 CAGGCTGACCTCTGCTCAGATGCCCCACCGGCAGACTGAGGGTAAC

SHR-B2 CAGGCTGACCTCTGCTCAGATGCCCCACCGGCAGACTGAGGGTAAC

SHR-A3 differs from BN reference sequence

9. Location: chr3:158127694 Intron

SHR-A3 TCTTTTGTCCCTTACCACTGACAAAGATCCCTGTTGTTGCTGGTGTG

SHR-B2 TCTTTTGTCCCTTACCACTGACAAAGATCCCTGTTGTTGCTGGTGTG

SHR-A3 differs from BN reference sequence

10. Location: chr3:158127366 Intron

SHR-A3 GCCTCCGTTGCACCTTGAGTTGGTTTACGGTGAGACCCTGTCTCAGAACAA

SHR-B2 GCCTCCGTTGCACCTTGAGTTGGTTTACGGTGAGACCCTGTCTCAGAACAA

SHR-A3 differs from BN reference sequence

11. Location: chr3:158126261 Intron

SHR-A3 TACACAGCTCGGCAAGGTGGGAGTTCCTGGCGGTTATCTGATGGTATCGG

SHR-B2 TACACAGCTCGGCAAGGTGGGAGTGCCTGGCGGTTATCTGATGGTATCGG  
SHR-A3 differs from BN reference sequence

12. Location: chr3:158125852 Intron

SHR-A3 TGCCTCTGGTCAGGACTCTTAGCCTCCAAGACAGTGTCTGTACAGCATA

SHR-B2 TGCCTCTGGTCAGGACTCTTAGCCTCCAAGCCAGTGTCTGTACAGCATA

SHR-A3 differs from BN reference sequence

Haplotype structure in SHR strains across this region. SHR-A3 and SHRSP/Gla are injury-prone strains. SHR-B2, SHR and SHR/NHsd are injury resistant strains. SHR lines with the same genotype as SHR-A3 at each variant site are colored pink at that site. SHR lines with the same genotype as SHR-B2 are shaded green when this genotype differs from the injury-prone lines. Genome sequence variation for SHRSP/Gla, SHR, SHR/NHsd was provided by the Rat Genome Database.

| Variant # | SHR-A3 | SHRSP/Gla | SHR-B2 | SHR | SHR/NHsd |
|-----------|--------|-----------|--------|-----|----------|
| 1         | C      | C         | T      | T   | T        |
| 2         | G      | G         | A      | A   | A        |
| 3         | G      | G         | A      | G   | G        |
| 4         | G      | G         | C      | C   | C        |
| 5         | C      | C         | T      | T   | T        |
| 6         | A      | A         | C      | C   | C        |
| 7         | G      | G         | A      | A   | A        |
| 8         | A      | A         | G      | A   | A        |
| 9         | A      | A         | G      | G   | G        |
| 10        | C      | C         | T      | T   | T        |
| 11        | T      | T         | G      | T   | T        |
| 12        | A      | A         | G      | G   | G        |

**Syk variants (positions from rn5):**

1. Location: chr17:14759592 proximal promoter

SHR-A3 GTTTCCTATTTTTAGCTTCAGAGTTTTTTTTTTTCATGTTACT

SHR-B2 GTTTCCTATTTTTAGCTTCAGAGTTTTTTTTTTTCATGTTACT

SHR-A3 differs from BN reference seq

2. Location: chr17:14730906 Intron

SHR-A3 GTGTTCAATCCCAGCATTACAAGGCAGAGTAGGGAATCTGTTC

SHR-B2 GTGTTCAATCCCAGCATTACAAGGCAGAGTAGGGAATCTGTTC

SHR-B2 differs from BN reference seq

3. Location: chr17:14728977 Intron

SHR-A3 CTGAGCCTCGCTGCCCCTGCACACCGCATGCCTGCTCCGGTTGTG

SHR-B2 CTGAGCCTCGCTGCCCCTGCACACCGCATGCCTGCTCCGGTTGTG

SHR-B2 differs from BN reference seq

4. Location: chr17:14721420 Exon

SHR-A3 GCCTGCCATGGACACCGAGGTATATGAGAGTCCTTACGCTG

SHR-B2 GCCTGCCATGGACACTGAGGTATATGAGAGTCCTTACGCTG

Synonymous, codon is Thr, third base of codon affected

SHR-A3 differs from BN reference seq

5. Location: chr17:14706170 3'UTR

SHR-A3 GGTACACGTGGTATCCACACAGAGGAAGCGAAGAATGAACAGGAA

SHR-B2 GGTACACGTGGTATCCACACTGAGGAAGCGAAGAATGAACAGGAA

SHR-A3 differs from BN reference seq

6. Location: chr17:14704598 3'UTR

SHR-A3 GGGTTGGGACTGACCATTTCGTTATCCGGATGTGACCAAGCAGAACGGAGG

SHR-B2 GGGTTGGGACTGACCATTTCGTTATCCGGATGTGACCAAGCAGAACGGAGG

SHR-B2 differs from BN reference seq

7. Location: chr17:14704464 3'UTR

SHR-A3 TCTGTTGAAAACGTGTCTTGCTGTCAAGATTAATTCTCTCCCCTG

SHR-B2 TCTGTTGAAAACGTGTCTTGCTGTCAAGATTAATTCTCTCCCCTG

SHR-B2 differs from BN reference seq

8. Location: chr17:14704198 3'UTR

SHR-A3 CCCTAATCTGCCTCGCCACATCCTACTGACCTCGCCACACCACATAACC

SHR-B2 CCCTAATCTGCCTCGCCACATACCACTGACCTCGCCACACCACATAACC

SHR-B2 differs from BN reference seq

9. Location: chr17:14704196 3'UTR

SHR-A3 CCCTAATCTGCCTCGCCACATCCTACTGACCTCGCCACACCACATAACC

SHR-B2 CCCTAATCTGCCTCGCCACATACCACTGACCTCGCCACACCACATAACC

SHR-A3 differs from BN reference seq

Haplotype structure in SHR strains across this region. SHR-A3 and SHRSP/Gla are injury-prone strains. SHR-B2, SHR and SHR/NHsd are injury resistant strains. SHR lines with the same genotype as SHR-A3 at each variant site are colored pink at that site. SHR lines with the same genotype as SHR-B2 are shaded green when this genotype differs from the injury-prone lines. Uncolored boxes indicate no genomic sequence variation data for SHRSP/Gla, SHR or SHR/NHsd. Genome sequence variation for SHRSP/Gla, SHR, SHR/NHsd was provided by the Rat Genome Database.

| Variant # | SHR-A3 | SHRSP/Gla | SHR-B2 | SHR | SHR/NHsd |
|-----------|--------|-----------|--------|-----|----------|
| 1         | -      |           | T      |     |          |
| 2         | A      | A         | G      | G   | G        |
| 3         | G      |           | -      |     |          |
| 4         | C      | C         | T      | T   | T        |
| 5         | A      | A         | T      | T   | T        |
| 6         | G      | G         | A      | A   | A        |
| 7         | C      | C         | T      | T   | T        |
| 8         | C      | C         | A      | A   | A        |
| 9         | T      | T         | C      | C   | C        |



**JunD variants (positions from rn5):**

1. Location: chr16:20344584 proximal promoter  
 SHR-A3 TGAGATCTTGTCTTAAAAA**T**AACCCAAAACAAAGATTAAA  
 SHR-B2 TGAGATCTTGTCTTAAAAA**C**AACCCAAAACAAAGATTAAA  
 SHR-B2 differs from BN reference seq

2. Location: chr16:20344303 proximal promoter  
 SHR-A3 ACCCTGGTTGGCGCC**CAGT**CCCCGAGGGGCGTGCCTAT  
 SHR-B2 ACCCTGGTTGGCGCC**CAGC**CCCCGAGGGGCGTGCCTAT  
 SHR-A3 differs from BN reference seq

3. Location: chr16:20344265 proximal promoter  
 SHR-A3 CTATGGTGGGCGTGACGC**C**GGGCGTGGCTTCTCAGAGG  
 SHR-B2 CTATGGTGGGCGTGACGC**C**GGGCGTGGCTTCTCAGAGG  
 SHR-B2 differs from BN reference seq

4. Location: chr16:20344104-5 proximal promoter  
 SHR-A3 GAGAGAGAGAGAGAGAGAGAG**GA**CAAGAAACAGCAGGGGA  
 SHR-B2 GAGAGAGAGAGAGAGAGAG**A**CAAGAAACAGCAGGGGA  
 SHR-A3 differs from BN reference seq

5. Location: chr16:20344084-5 proximal promoter  
 SHR-A3 GGGAGGAAGAGAGAGGG**G**GAGAGAGAGAGAGAGAGA  
 SHR-B2 GGGAGGAAGAGAGAGGG**T**AGAGAGAGAGAGAGAGAGA  
 SHR-B2 differs from BN reference seq

6. Location: chr16:20343878 proximal promoter  
 SHR-A3 CCCGCCCTTTATGCAAAT**C**CACGACGTCACCTCGAGCC  
 SHR-B2 CCCGCCCTTTATGCAAAT**C**CACGACGTCACCTCGAGCC  
 SHR-B2 differs from BN reference seq

7. Location: chr16:20342252-4 3'-UTR  
 SHR-A3 TTTTAAAGAAACGGGAAG**A**AAAAAAAAAATCCTCCC  
 SHR-B2 TTTTAAAGAAACGGGAAG**A**AAAAAAAAAATCCTCCC  
 SHR-A3 differs from BN reference seq

Haplotype structure in SHR strains across this region. SHR-A3 and SHRSP/Gla are injury-prone strains. SHR-B2, SHR and SHR/NHsd are injury resistant strains. SHR lines with the same genotype as SHR-A3 at each variant site are colored pink at that site. SHR lines with the same genotype as SHR-B2 are shaded green when this genotype differs from the injury-prone lines. Uncolored boxes indicate no genomic sequence variation data for SHRSP/Gla, SHR or SHR/NHsd. Genome sequence variation for SHRSP/Gla, SHR, SHR/NHsd was provided by the Rat Genome Database.

| Variant # | SHR-A3 | SHRSP/Gla | SHR-B2 | SHR | SHR/NHsd |
|-----------|--------|-----------|--------|-----|----------|
| 1         | T      | T         | C      | C   | C        |
| 2         | T      | T         | C      | C   | C        |
| 3         | G      |           | -      |     |          |
| 4         | GA     |           | --     |     |          |
| 5         | --     |           | TA     |     |          |

|   |     |   |     |   |   |
|---|-----|---|-----|---|---|
| 6 | C   | C | T   | T | T |
| 7 | --- |   | AAG |   |   |

## Supplemental statistical analysis for Figure 6.

### SHR-A3 ctrl BP vs time

Call:  
lm(formula = sample1\$BP ~ poly(sample1\$Week, 2, raw = TRUE))

Residuals:

| Min      | 1Q      | Median  | 3Q     | Max     |
|----------|---------|---------|--------|---------|
| -24.5763 | -7.7596 | -0.4215 | 7.9176 | 24.1168 |

#### Coefficients:

|                                     | Estimate | Std. Error | t value | Pr(> t )    |
|-------------------------------------|----------|------------|---------|-------------|
| (Intercept)                         | 198.1606 | 5.0170     | 39.498  | < 2e-16 *** |
| poly(sample1\$Week, 2, raw = TRUE)1 | 8.6372   | 2.5579     | 3.377   | 0.00115 **  |
| poly(sample1\$Week, 2, raw = TRUE)2 | -0.6258  | 0.2774     | -2.256  | 0.02693 *   |

Signif. codes: 0 '\*\*\*' 0.001 '\*\*' 0.01 '\*' 0.05 '.' 0.1 ' ' 1

Residual standard error: 11.37 on 77 degrees of freedom  
Multiple R-squared: 0.3089, Adjusted R-squared: 0.2909  
F-statistic: 17.21 on 2 and 77 DF, p-value: 6.644e-07

### SHR-A3 +MMF BP vs time

Call:  
lm(formula = sample2\$BP ~ poly(sample2\$Week, 2, raw = TRUE))

Residuals:

| Min      | 1Q      | Median | 3Q     | Max     |
|----------|---------|--------|--------|---------|
| -30.8104 | -3.2991 | 0.8181 | 6.3479 | 28.5903 |

#### Coefficients:

|                                     | Estimate | Std. Error | t value | Pr(> t )   |
|-------------------------------------|----------|------------|---------|------------|
| (Intercept)                         | 190.2577 | 4.9032     | 38.803  | <2e-16 *** |
| poly(sample2\$Week, 2, raw = TRUE)1 | 3.0319   | 2.4999     | 1.213   | 0.229      |
| poly(sample2\$Week, 2, raw = TRUE)2 | -0.2889  | 0.2711     | -1.065  | 0.290      |

Signif. codes: 0 '\*\*\*' 0.001 '\*\*' 0.01 '\*' 0.05 '.' 0.1 ' ' 1

Residual standard error: 11.11 on 77 degrees of freedom  
Multiple R-squared: 0.02247, Adjusted R-squared: -0.002918  
F-statistic: 0.8851 on 2 and 77 DF, p-value: 0.4168

### SHR-B2 ctrl BP vs time

Call:  
lm(formula = sample3\$BP ~ poly(sample3\$Week, 2, raw = TRUE))

Residuals:

| Min      | 1Q      | Median  | 3Q     | Max     |
|----------|---------|---------|--------|---------|
| -24.0196 | -5.0269 | -0.6765 | 5.2464 | 13.5330 |

#### Coefficients:

|                                     | Estimate | Std. Error | t value | Pr(> t )   |
|-------------------------------------|----------|------------|---------|------------|
| (Intercept)                         | 164.9447 | 3.4117     | 48.346  | <2e-16 *** |
| poly(sample3\$Week, 2, raw = TRUE)1 | 4.1114   | 1.7395     | 2.364   | 0.0213 *   |
| poly(sample3\$Week, 2, raw = TRUE)2 | -0.3412  | 0.1887     | -1.809  | 0.0754 .   |

Signif. codes: 0 '\*\*\*' 0.001 '\*\*' 0.01 '\*' 0.05 '.' 0.1 ' ' 1

Residual standard error: 6.917 on 61 degrees of freedom  
Multiple R-squared: 0.1513, Adjusted R-squared: 0.1235  
F-statistic: 5.437 on 2 and 61 DF, p-value: 0.006719

### SHR-B2 +MMF BP vs time

Call:  
lm(formula = sample4\$BP ~ poly(sample4\$Week, 2, raw = TRUE))

Residuals:  
Min            1Q            Median            3Q            Max  
-16.149       -7.277       -3.458       7.755       19.859

**Coefficients:**

|                                     | Estimate | Std. Error | t value | Pr(> t )   |
|-------------------------------------|----------|------------|---------|------------|
| (Intercept)                         | 164.9861 | 4.5248     | 36.462  | <2e-16 *** |
| poly(sample4\$Week, 2, raw = TRUE)1 | 2.7700   | 2.3527     | 1.177   | 0.243      |
| poly(sample4\$Week, 2, raw = TRUE)2 | -0.3237  | 0.2573     | -1.258  | 0.213      |

---  
Signif. codes: 0 '\*\*\*' 0.001 '\*\*' 0.01 '\*' 0.05 '.' 0.1 ' ' 1

Residual standard error: 9.597 on 63 degrees of freedom  
Multiple R-squared: 0.02533, Adjusted R-squared: -0.005608  
F-statistic: 0.8188 on 2 and 63 DF, p-value: 0.4456

Supplemental Figure 1.

Renal JunD expression determined by Affymetrix array in F2 rats inheriting contrasting JunD alleles, is determined in cis by the JunD allele inherited.

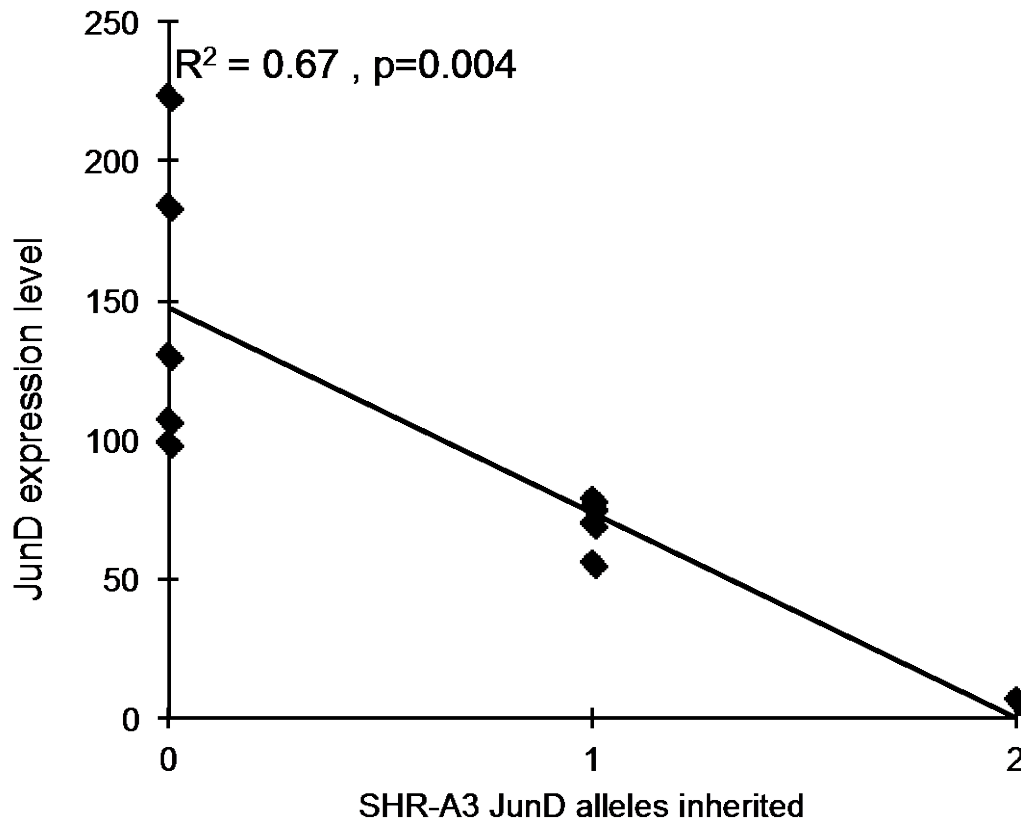

Supplemental Figure 2.

Representative photomicrographs of CD43 immunohistochemistry in SHR-A3 and SHR-B2 animals at 25 wks of age with (+ MMF) and without (CTRL) 8 weeks of MMF treatment

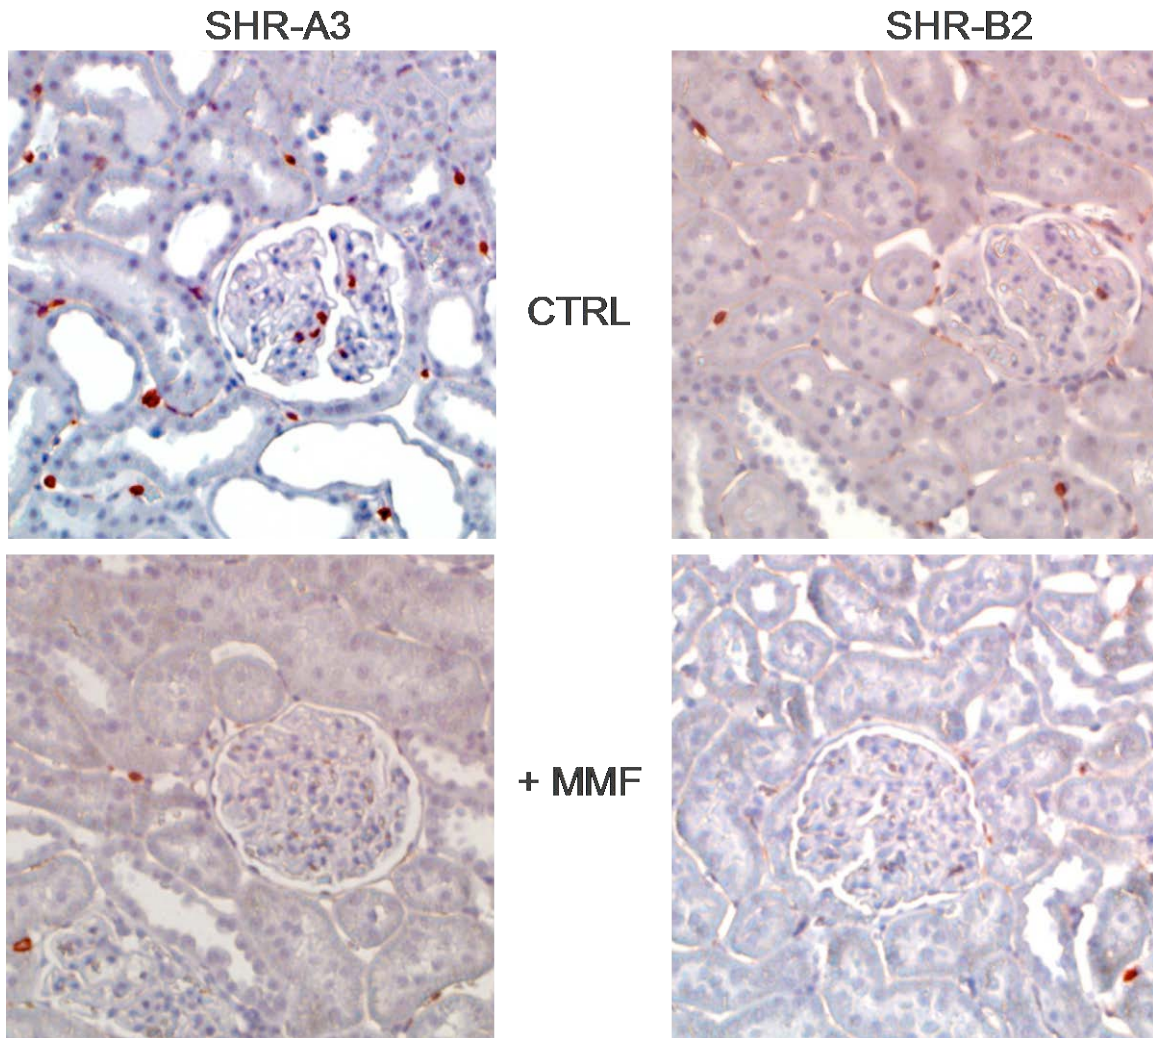

Supplemental Figure 3.

Divergence at the nucleotide level between the rat reference genome sequence derived from the Brown Norway strain and SHR-A3 and SHR-B2 in the haplotype block on chromosome 3 that contains *Src* (chr3:148,157,256-148,170,524). The vertical axis indicates the number of bases that differ in each rat strain compared to the reference. This value was calculated by dividing the region into bins of 100,000 bases and summing the number of variants for each bin across the entire region. In regions of identity by descent SHR-A3 and SHR-B2 are descended from a common ancestor and share the same divergence from the rat reference genome. In this block of non-identity by descent SHR-A3 is more divergent from the rat reference strain than SHR-B2 and differences in divergence vary across this region.

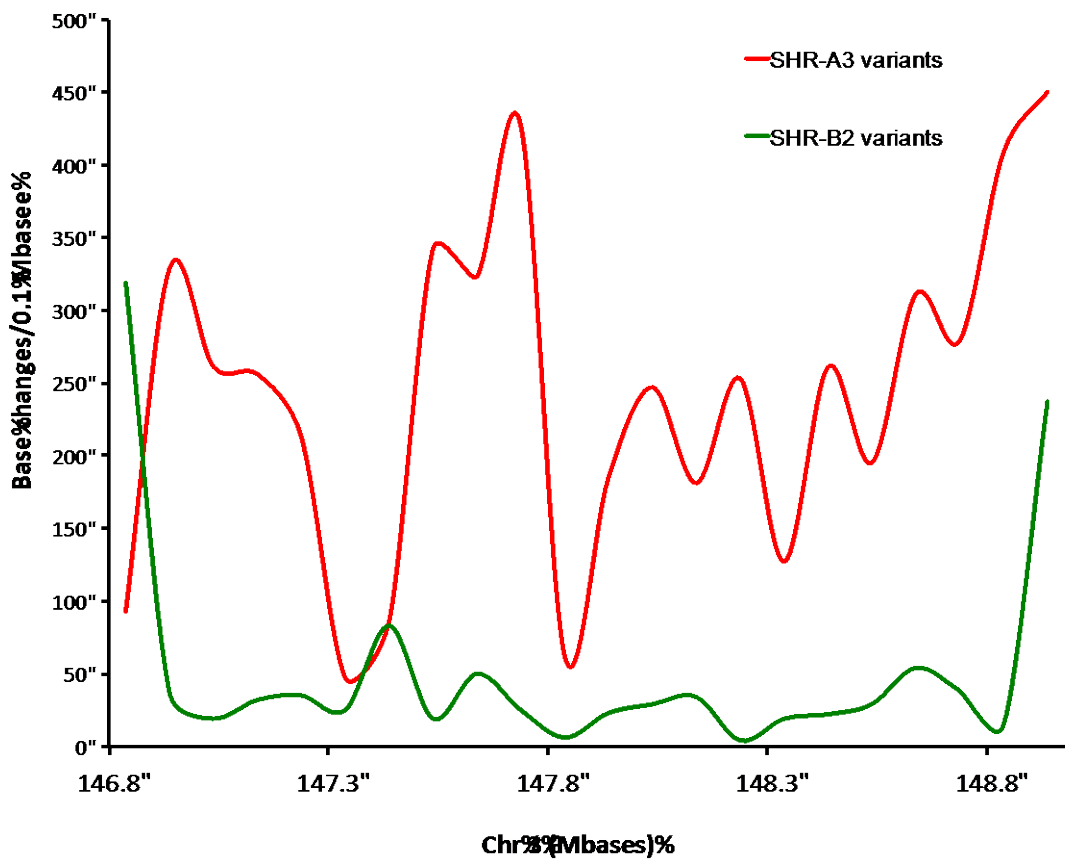

Supplemental Figure 4.

Divergence at the nucleotide level between the rat reference genome sequence derived from the Brown Norway strain and SHR-A3 and SHR-B2 in the haplotype block on chromosome 16 that contains JunD (chr16:19,239,694-19,241,529). In this block of non-identity by descent the degree of divergence is less between SHR-A3 and SHR-B2, possibly indicating that this region of the chromosome is derived from a more recent common ancestor that is shared by the two lines than is suggested by Supplemental Figure 3 where the nucleotide divergence is greater.

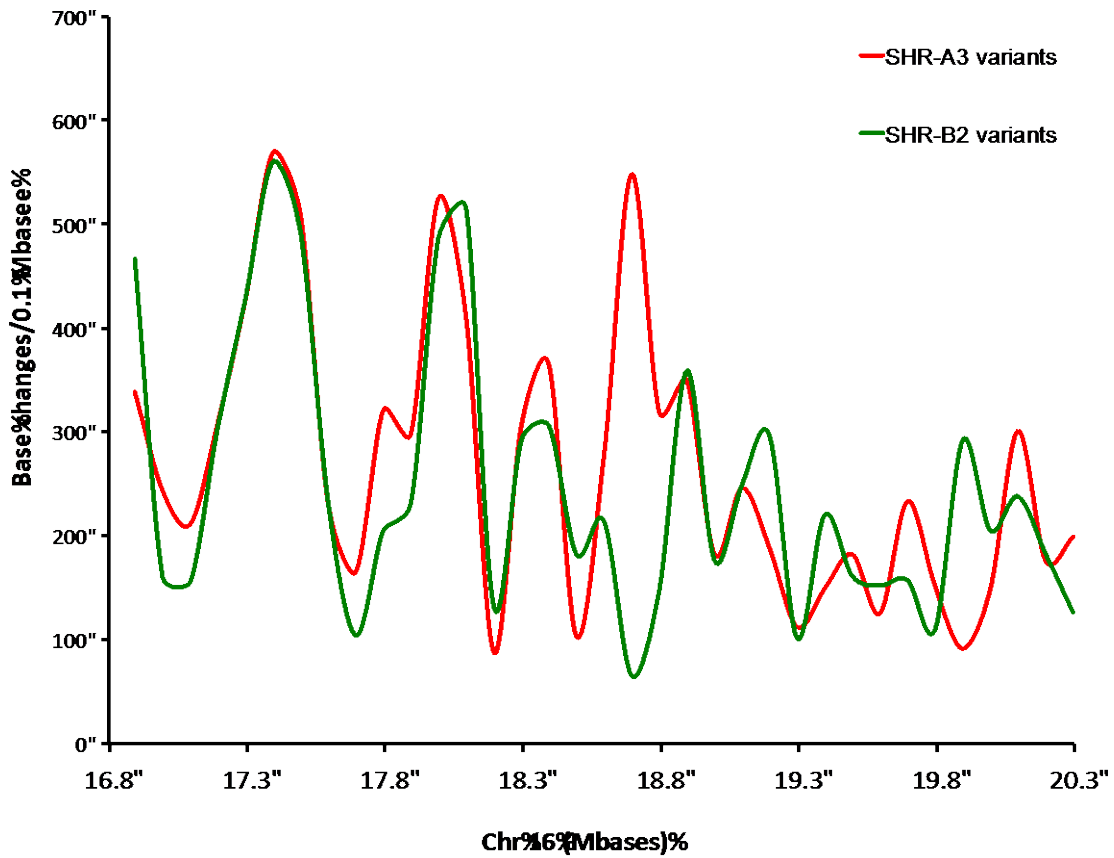



Supplemental Figure 5.

Divergence at the nucleotide level between the rat reference genome sequence derived from the Brown Norway strain and SHR-A3 and SHR-B2 in the haplotype block on chromosome 17 that contains Dok3 (chr17: 15,154,414-15,159,609) and Syk (chr17: 18,440,672-18,498,001).

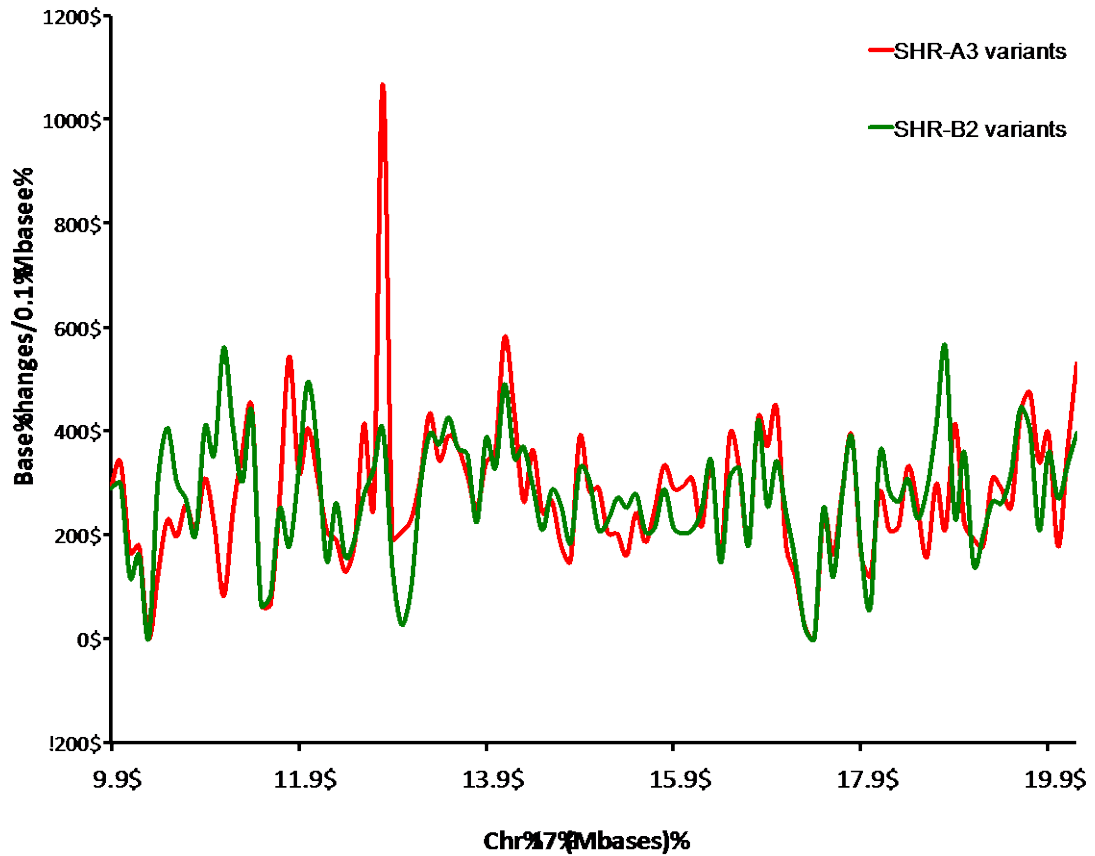

Supplement: NIHMS640712-supplement-000533_-_Supplemental_Material.pdf [file NIHMS640712-supplement-000533_-_Supplemental_Material.pdf]
